# Supplementary material for: Fumonisin B1: A Tool for Exploring the Multiple Functions of Sphingolipids in Plants
Source: PubMed Central journal article supplement (PMC7652989; doi:10.3389/fpls.2020.600458), 2020-10-27
Supplement: Image_1.pdf [file Image_1.pdf]

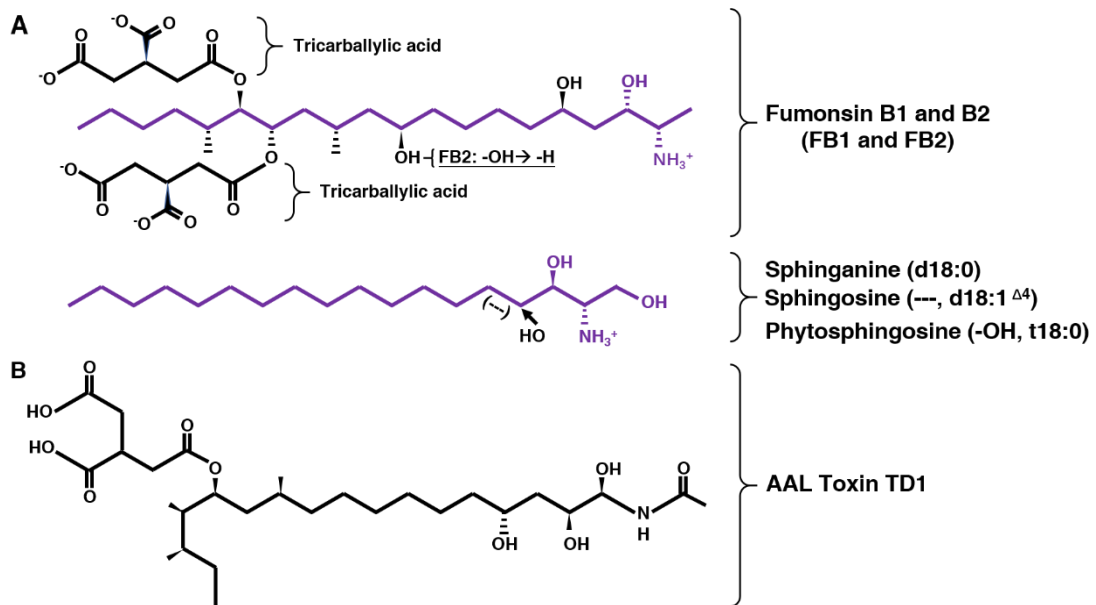

**Supplemental Figure S1.** Structures of major fumonisins, representative LCBs and AAL toxin.

A. Comparison of the structures of FBs with sphinganine, sphingosine and phytosphingosine. The fumonisins B1 (FB1), B2, and representative long-chain bases (LCBs) are shown with highlighting of the sphingoid base-like portion in purple. B. Structures of *Alternaria alternata* f.sp. *lycopersici* (AAL) toxin TD1.
